# Supplementary material for: Molecular Breeding of Water-Saving and Drought-Resistant Rice for Blast and Bacterial Blight Resistance
Source: MDPI journal article supplement (doi:10.3390/plants11192641), 2022-10-08
Supplement: s1 [file s1]

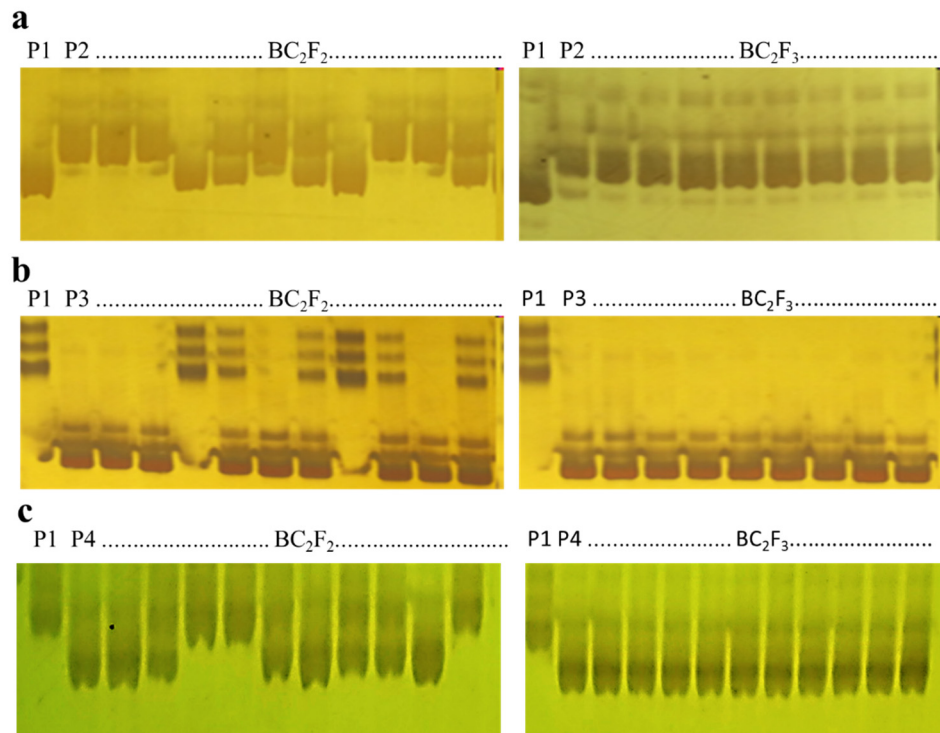

Figure S1 Foreground selection at the BC<sub>2</sub>F<sub>2</sub> and BC<sub>2</sub>F<sub>3</sub> generations using linked markers. Plats were screened for *Pi2* using the linked marker AP22 (**a**), and plants were screened for *Xa23* using the linked marker RM206 (**b**), and plants were screened for *xa5* using the linked marker RM611 (**c**). **a** Left panel: PCR analysis of *Pi2* in the BC<sub>2</sub>F<sub>2</sub> generation; Right panel: PCR analysis of *Pi2* in the BC<sub>2</sub>F<sub>3</sub> generation; **b** Left panel: PCR analysis of *Xa23* in the BC<sub>2</sub>F<sub>2</sub> generation; Right panel: PCR analysis of *Xa23* in the BC<sub>2</sub>F<sub>3</sub> generation. **c** Left panel: PCR analysis of *xa5* in the BC<sub>2</sub>F<sub>2</sub> generation; Right panel: PCR analysis of *xa5* in the BC<sub>2</sub>F<sub>3</sub> generation. P1: Hanhui3; P2: BL6; P3: CBB23; P4: IRBB5.
